# Supplementary material for: Defatted Seed Residue of Cucumis Melo as a Novel, Renewable and Green Biosorbent for Removal of Selected Heavy Metals from Wastewater: Kinetic and Isothermal Study
Source: MDPI journal article supplement (doi:10.3390/molecules27196671), 2022-10-07
Supplement: s1 [file s1]

## SUPPLEMENTARY MATERIAL

### FOR

“Defatted Seed Residue of *Cucumis melo* as a Novel, Renewable and Green Biosorbent for Removal of Selected Heavy Metals from Wastewater: Kinetic and Isothermal Study”

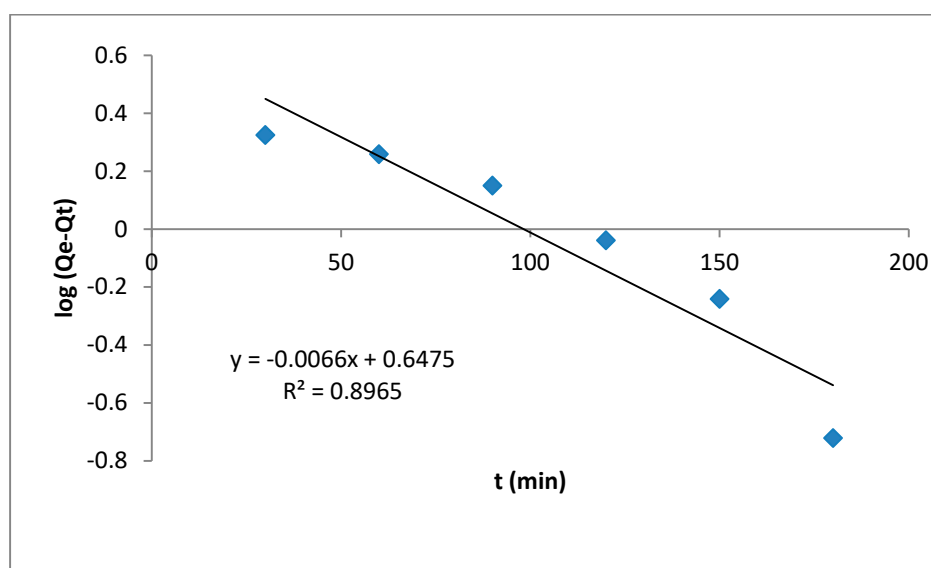

Figure S1. Plot of  $\log (Q_e - Q_t)$  Vs. time for Pseudo-first order kinetic model (Linear Form), for Pb

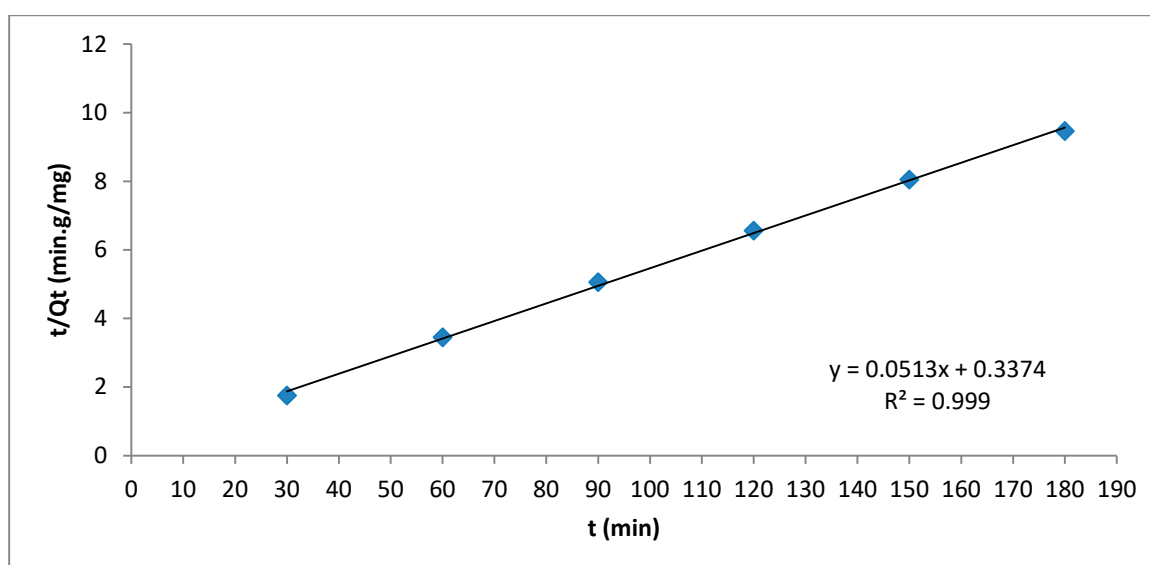

**Figure S2. Plot of  $t/Q_t$  Vs time for Pseudo-second order kinetic model (Type 1), for Pb**

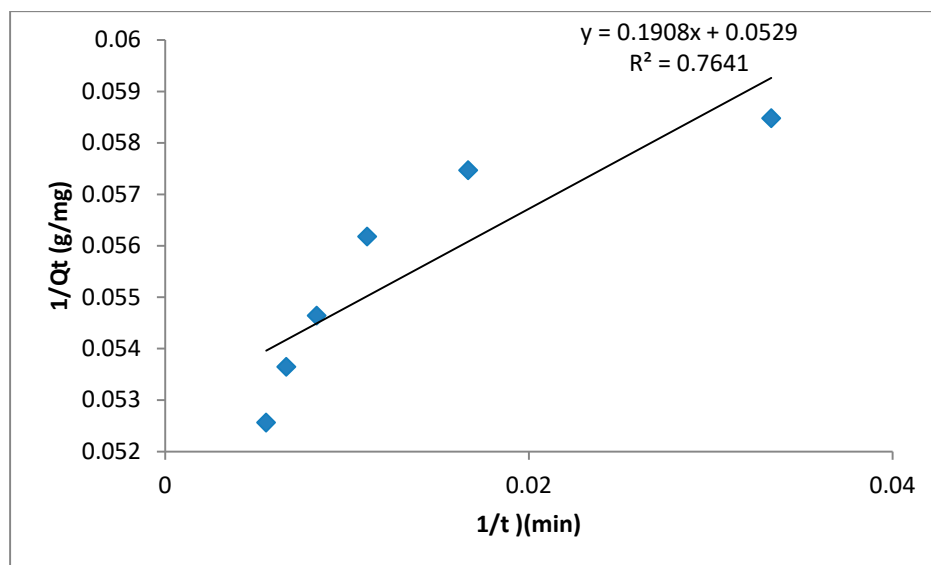

**Figure S3. Plot of  $1/Q_t$  Vs  $1/t$  for Pseudo-second order kinetic model (Type 2), for Pb**

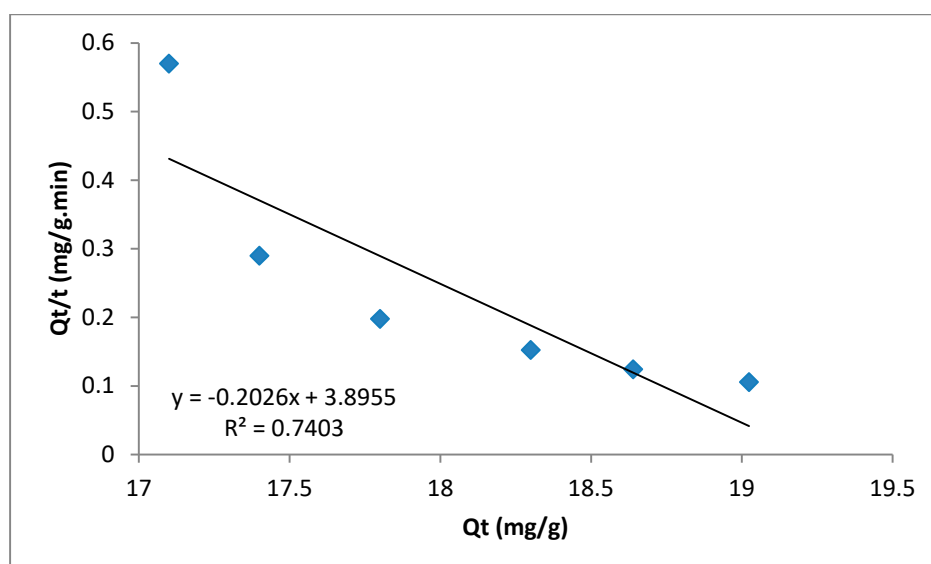

**Figure S4. Plot of  $Q_t/t$  Vs.  $Q_t$  for Pseudo-second order kinetic model (Type 3), for Pb**

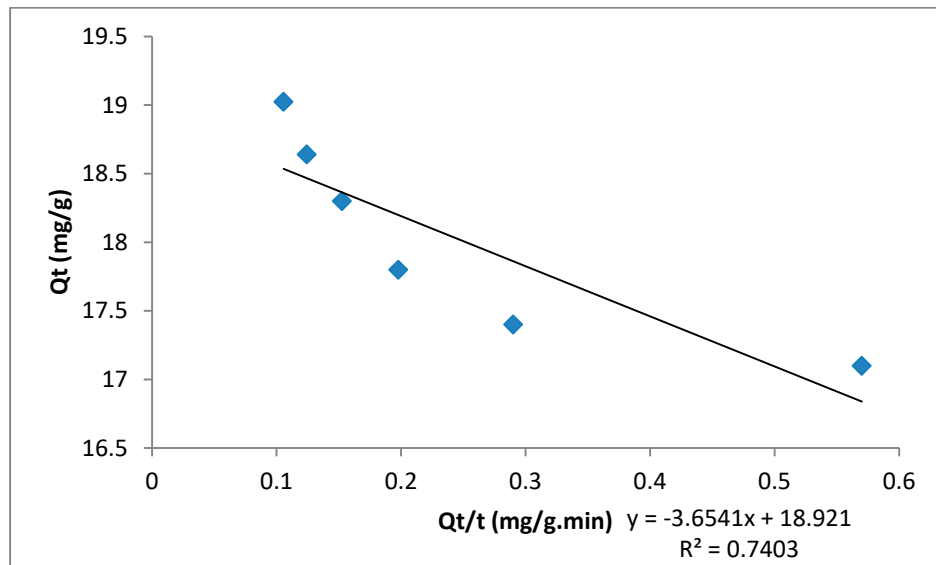

**Figure S5. Plot of  $Q_t$  Vs.  $Q_t/t$  for Pseudo-second order kinetic model (Type 4), for Pb**

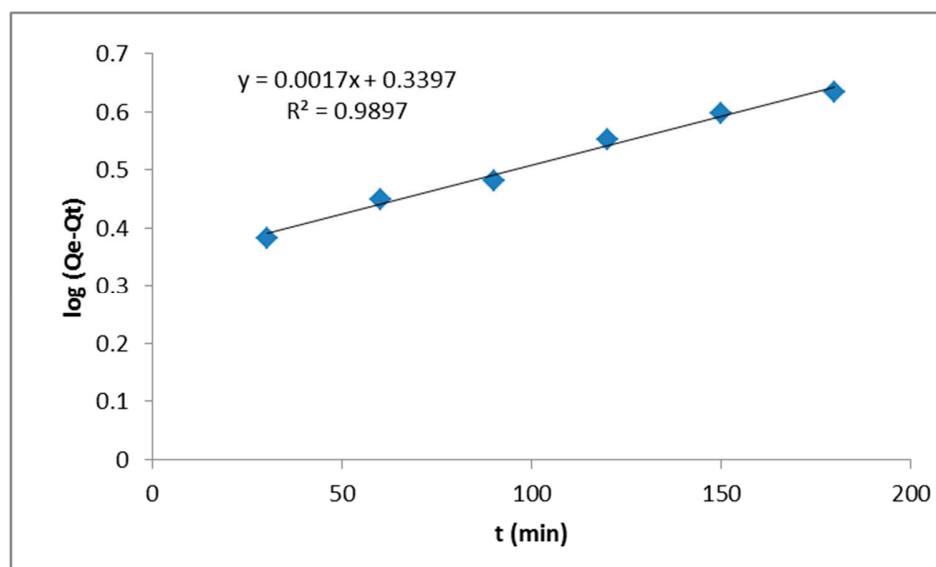

**Figure S6. Plot of  $\log (Q_e - Q_t)$  Vs. time for Pseudo-first order kinetic model (Linear Form), for Cr**

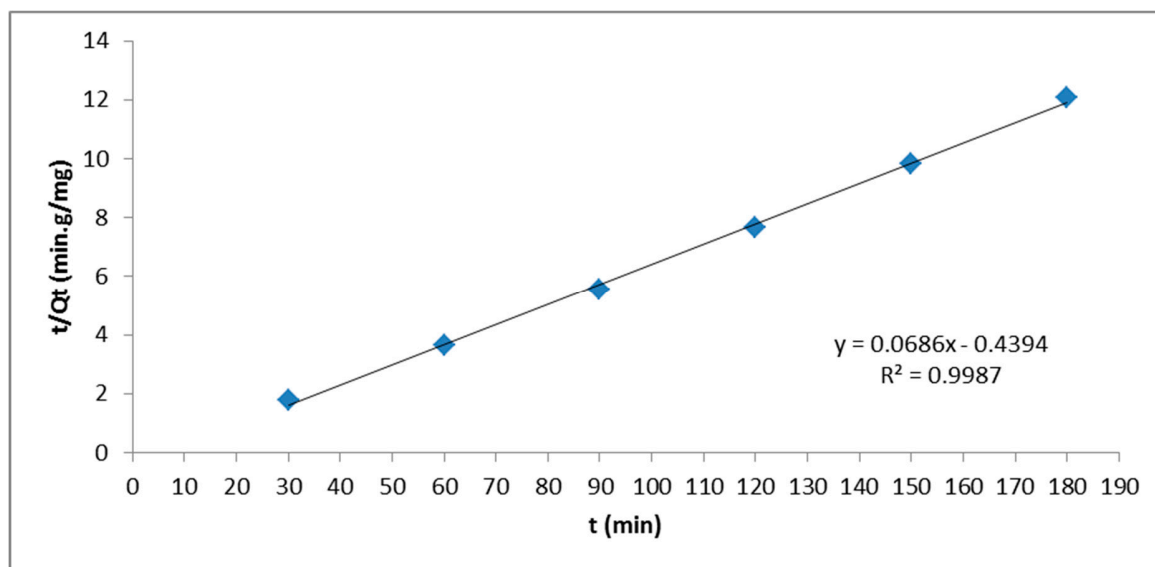

**Figure S7. Plot of  $t/Q_t$  Vs time for Pseudo-second order kinetic model (Type 1), for Cr**

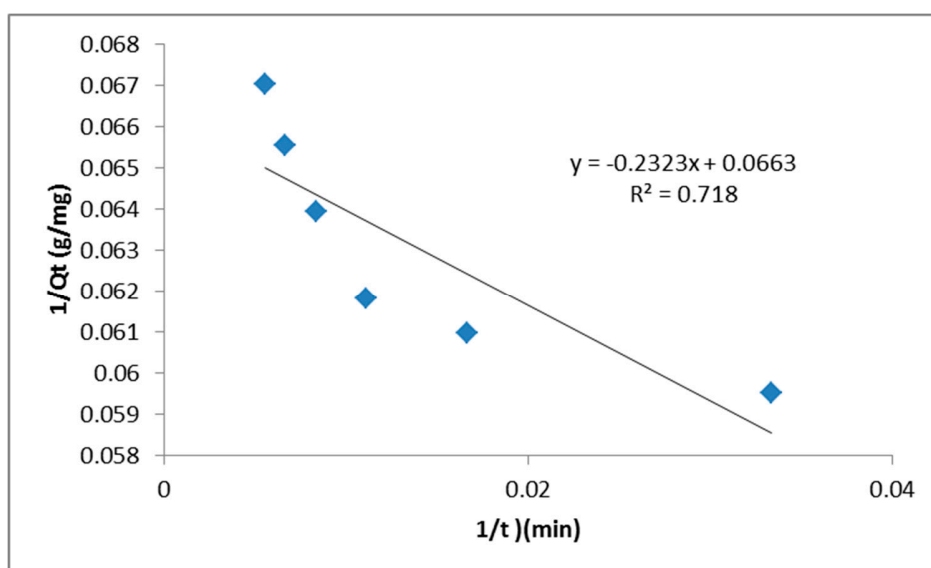

**Figure S8. Plot of  $1/Q_t$  Vs  $1/t$  for Pseudo-second order kinetic model (Type 2), for Cr**

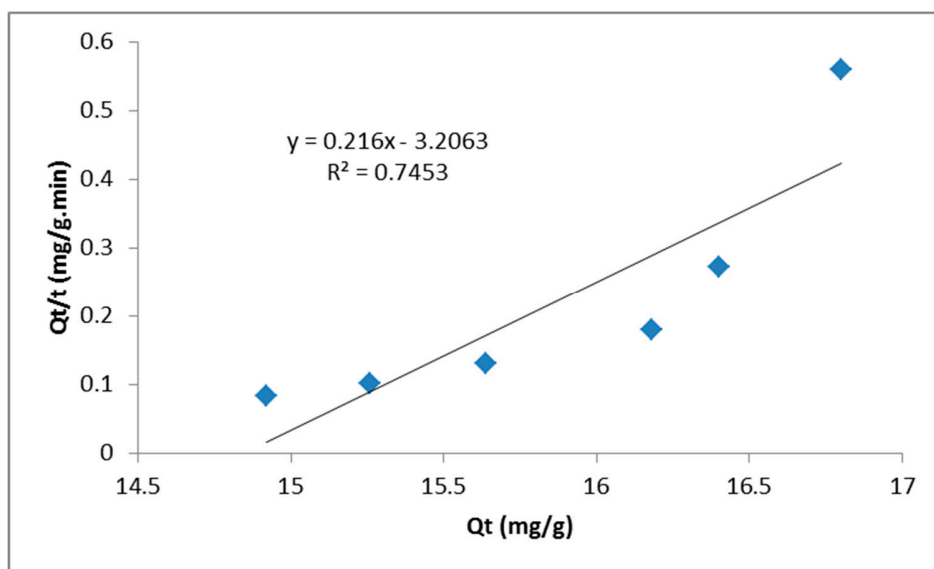

**Figure S9. Plot of  $Q_t/t$  Vs.  $Q_t$  for Pseudo-second order kinetic model (Type 3), for Cr**

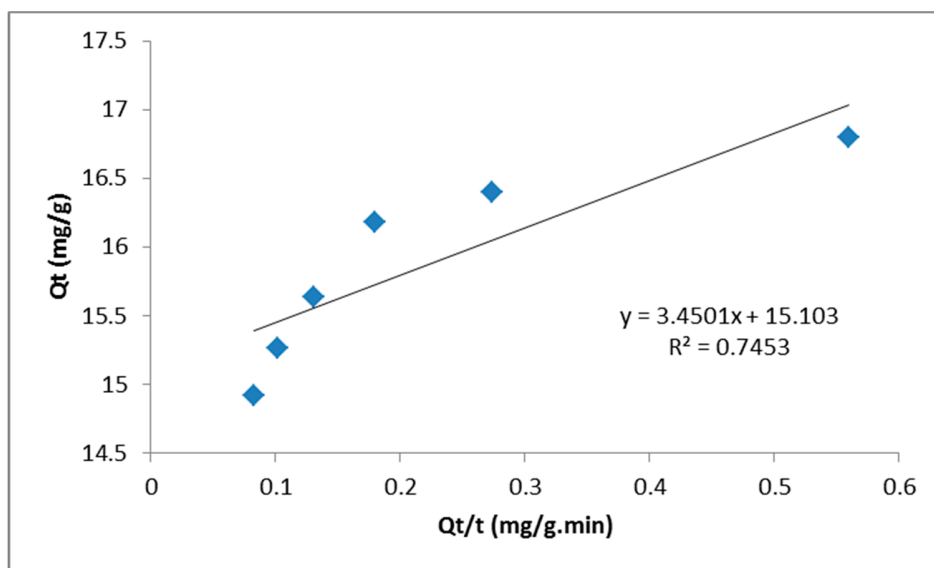

**Figure S10. Plot of  $Q_t$  Vs.  $Q_t/t$  for Pseudo-second order kinetic model (Type 4), for Cr**

**Table S1. Pseudo-First-Order and Second-Order Kinetic Models Applied on Present Work (biosorption of Pb and Cr on defatted seed residue of *C. melo*)**

| <b>Pseudo-Second-Order Model Form</b>      |        | <b>Equation</b>                                                                             | <b>Plot</b>              | <b>Parameters</b>                                                                                                 |
|--------------------------------------------|--------|---------------------------------------------------------------------------------------------|--------------------------|-------------------------------------------------------------------------------------------------------------------|
| <b>Linear Forms</b>                        | Type 1 | $\frac{t}{Q_t} = \frac{1}{k_2 Q_e^2} + \left(\frac{1}{Q_e}\right) t$                        | $t/Q_t$ vs. $t$          | $Q_e = 1/\text{Slope}$<br>$h = 1/\text{Intercept}$<br>$k = (\text{slope})^2/\text{Intercept}$                     |
|                                            | Type2  | $\frac{1}{Q_t} = \left(\frac{1}{k_2 Q_e^2}\right) \frac{1}{t} + \left(\frac{1}{Q_e}\right)$ | $1/Q_t$ vs. $1/t$        | $Q_e = 1/\text{Intercept}$<br>$h = 1/\text{Slope}$<br>$k = (\text{Intercept})^2/\text{Slop}$                      |
|                                            | Type 3 | $\frac{Q_t}{t} = k Q_e^2 - k Q_e Q_t$                                                       | $Q_t/t$ vs. $Q_t$        | $Q_e = -\text{Intercept}/\text{Slop}$<br>$h = \text{Intercept}$<br>$k = (\text{Slop})^2/\text{Intercept}$         |
|                                            | Type 4 | $Q_t = Q_e - \left(\frac{1}{k Q_e}\right) \frac{Q_t}{t}$                                    | $Q_t$ vs. $Q_t/t$        | $Q_e = \text{Intercept}$<br>$h = -\text{Intercept}/\text{Slop}$<br>$k = -1/(\text{Intercept} \times \text{Slop})$ |
| <b>Pseudo-Second-Order Non-Linear Form</b> |        | $Q_t = \frac{k_2 Q_e^2 t}{1 + k_2 Q_e t}$                                                   | $1/Q_t$ vs. $1/t$        | $Q_e = 1/\text{Intercept}$<br>$h = 1/\text{Slope}$<br>$k = (\text{Intercept})^2/\text{Slop}$                      |
| <b>Pseudo-First-Order Lineal Form</b>      |        | $\ln(Q_e - Q_t) = \ln(Q_e) - k_1 t$                                                         | $\ln(Q_e - Q_t)$ vs. $t$ | $k = \text{Slop}$                                                                                                 |

|                                           |                              |                          |                   |
|-------------------------------------------|------------------------------|--------------------------|-------------------|
| <b>Pseudo-First-Order Non-Linear Form</b> | $Q_t = Q_e (1 - e^{-k_1 t})$ | $\ln(Q_e - Q_t)$ vs. $t$ | $k = \text{Slop}$ |
|-------------------------------------------|------------------------------|--------------------------|-------------------|
